# 1 Connecting surveillance and population-level influenza 2 incidence

3 Robert C. Cope<sup>1,\*</sup>, Joshua V. Ross<sup>1</sup>, Monique Chilver<sup>2</sup>, Nigel P. Stocks<sup>2</sup>, and Lewis  
4 Mitchell<sup>2,3</sup>

5 <sup>1</sup>School of Mathematical Sciences, The University of Adelaide, Adelaide, SA 5005, Australia

6 <sup>2</sup>Discipline of General Practice, The University of Adelaide, Adelaide, SA 5005, Australia

7 <sup>3</sup>Stream Leader, Data to Decisions Cooperative Research Centre (D2D CRC), Adelaide,  
8 SA, Australia

9 \*To whom correspondence should be addressed. Email: [robert.cope@adelaide.edu.au](mailto:robert.cope@adelaide.edu.au);  
10 phone: +61 8 8313 1082; fax: +61 8 8313 3696.

## 11 Abstract

12 There is substantial interest in estimating and forecasting influenza incidence. Surveillance of influenza is  
13 challenging as one needs to demarcate influenza from other respiratory viruses, and due to asymptomatic in-  
14 fections. To circumvent these challenges, surveillance data often targets influenza-like-illness, or uses context-  
15 specific normalisations such as test positivity or per-consultation rates. Specifically, influenza incidence itself  
16 is not reported. We propose a framework to estimate population-level influenza incidence, and its associated  
17 uncertainty, using surveillance data and hierarchical observation processes. This new framework, and fore-  
18 casting and forecast assessment methods, are demonstrated for three Australian states over 2016 and 2017.  
19 The framework allows for comparison within and between seasons in which surveillance effort has varied.  
20 Implementing this framework would improve influenza surveillance and forecasting globally, and could be  
21 applied to other diseases for which surveillance is difficult.

## 22 1 Introduction

23 Influenza is a respiratory virus of substantial public health concern globally, causing variable morbidity and  
24 mortality depending on the strains circulating each season. Consequently, influenza is subject to surveillance  
25 in many jurisdictions. Influenza surveillance is difficult due to: the potential for mild or asymptomatic cases  
26 being unreported; influenza needing to be demarcated from other respiratory viruses in clinical settings;  
27 and, the complexity of influenza immunity (particularly relating to different strains and antigenic drift)  
28 [1, 2, 3, 4]. Due to this, influenza surveillance is often framed around influenza-like-illness (ILI) rather than  
29 influenza specifically, and reported under context-specific normalisations (e.g., per-consultation rates) that  
30 work in unintuitive ways and do not appropriately quantify uncertainty. This has unintended consequences,  
31 such as influenza estimates depending upon the prevalence of other respiratory infections. When influenza  
32 specific test results are reported, they often lack the denominators necessary to produce accurate quantitative  
33 comparisons within and between seasons [5]. Multiple surveillance data streams generally exist, but they are  
34 not assimilated to produce a population-level probabilistic estimate of influenza incidence. In the worst case  
35 the lack of such a framework could impact decisions based upon surveillance, such as the allocation of public  
36 health resources.

37 We propose that, when influenza is the primary concern, surveillance should strive to report, model, and  
38 assess influenza specifically, rather than ILI, at the population level. This framework can be achieved by

39 carefully considering how population processes lead to observed data, i.e., the observation process, and how  
40 this introduces uncertainty to an analysis.

41 In addition to influenza surveillance, which addresses past and current influenza incidence, substantial  
42 research has been directed towards forecasting influenza incidence [6, 7, 8, 9, 10], including ongoing initiatives  
43 supported by the US CDC [11, 12]. Effective forecasting assists public health planning and management,  
44 providing estimates in advance for resource allocation. However, challenges in influenza surveillance extend  
45 directly to forecasting, but this has not been fully acknowledged to date. The uncertainty inherent in disease  
46 surveillance impacts not just the forecast, but propagates to assessments of forecast accuracy. Historical  
47 estimates of quantities such as the peak week of a season should be *probabilistic* estimates rather than *point*  
48 estimates, and consequently forecasts of these quantities should be assessed against probabilistic estimates.  
49 We demonstrate this new framework applied to influenza surveillance, forecasting and rigorous forecast  
50 assessment (Figure 1) using data from an existing influenza surveillance system in Australia (the Australian  
51 Sentinel Practices Research Network, ASPREN; [13]).

52 Our gold standard influenza surveillance and forecasting framework shifts to whole population estimates  
53 of influenza informed by observation processes, incorporating the variability inherent in surveillance systems;  
54 this also facilitates rigorous assessment of forecast outputs. This framework could also be applied more  
55 widely across communicable diseases, particularly when not every case is observed, tested or reported.

## 56 1.1 Influenza surveillance

57 Influenza surveillance systems are continually evolving, due to a combination of technological advances,  
58 new approaches, and renewed interest in response to the 2009 pandemic [14, 15]. Consequently, there is  
59 substantial variation in reporting at both long and short timescales (e.g., in outpatient or general practice  
60 based surveillance systems, such as the ILINet system in USA, or ASPREN in Australia [13]), or participation  
61 (in participatory surveillance systems, such as the Influenzanet program in Europe [16], or the Flutracking  
62 program in Australia [17, 18]). Further variation exists because some surveillance systems assess influenza  
63 specifically (requiring tests to be performed, possibly of variable accuracy, and where negative results may  
64 not be reported), while others measure influenza-like-illness (ILI) [5]. It is widely acknowledged that due to  
65 this variation (and in particular due to increases in surveillance effort over time), raw counts of ILI cases,  
66 or of positive tests, are not appropriate measures of population epidemic severity [5, 19]; to compensate,  
67 common strategies include: per-consultation or per-participant rates; test positivity; or, combinations of  
68 these strategies. These are intuitive and effective approaches; however, these highly-filtered observations and  
69 proxies provide an indication of the target quantity (i.e., population-level influenza incidence) that is subject  
70 to uncertainty. The relationship between observed data and population-level disease incidence should be  
71 described formally, and its uncertainty quantified. When the number of samples is very large, uncertainty  
72 may be relatively small, but should still be quantified, and often surveillance systems operate in contexts  
73 where only a small proportion of cases are tested, or only a small proportion of doctors report, leading to  
74 highly-filtered data and thus high uncertainty.

75 A further challenge with per-consultation or per-participant estimates is that they necessarily depend on  
76 additional factors that may have no relation to influenza and in addition may be poorly resolved: for example,  
77 participants in a voluntary online surveillance system may choose whether or not to report in a non-random  
78 way, or consultations at outpatient doctors may vary based on incidence of unrelated diseases (and so an  
79 outbreak of e.g. Gastroenteritis might inadvertently impact perceived influenza season severity). To rectify  
80 these problems, we propose that estimates from observed data should (carefully) drive probabilistic estimates  
81 at the population level, by considering, in each case, the (hierarchical) observation process that leads true  
82 population-level influenza incidence to be filtered down to the observed level. This careful analysis of the  
83 observation process should be applied at each stage of an analysis: during surveillance and reporting, and  
84 extended to modeling, forecasting, and forecast assessment.

## Surveillance

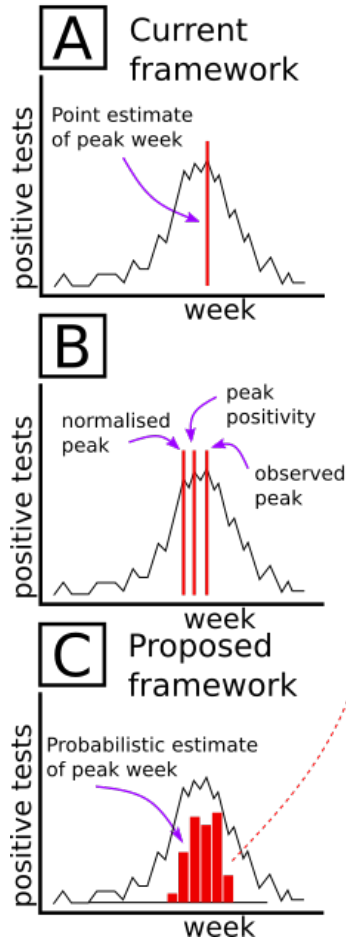

## Forecast assessment

Figure 1: Schematic illustration of proposed framework for surveillance and forecasting, using peak week as an example. Given an observed influenza surveillance time series, the peak week is typically assumed to be a point estimate based on these data, as in (A); different ways of analysing these influenza surveillance data can lead to different point estimates of the peak week (B), for example based on test positivity, or per-consultation rates. Instead, we propose it should be a probabilistic estimate as in (C), because the observed time series is a sample or an estimate of the population-level dynamics, with associated uncertainty. Taking the observation process into account we can obtain probabilistic forecasts of influenza in the population (D), which can then be used to produce probabilistic forecasts of quantities such as the peak week (E). To assess these forecasts, we propose modified metrics that take into account that the true peak week has a distribution rather than a point estimate (F).

## 85 1.2 Example surveillance system and observation process

86 The Australian Sentinel Practices Research Network (ASPREN) [13, 20] is a network of general practitioners  
87 (GPs) distributed throughout Australia. The target coverage is approximately one GP per 200,000 people  
88 in metropolitan areas, and one GP per 50,000 people in regional areas. This database is continually updated  
89 and requires the voluntary participation of GPs, so there is variation between years and locations. All GPs  
90 in the database report the number of consultations they performed each week, along with every case of a  
91 notifiable disease that they observe, including influenza-like-illness (ILI). GPs are asked to take swab samples  
92 from a proportion of those patients presenting ILI symptoms (20% in 2015–2017), and these samples are sent  
93 for virological (PCR) testing, resulting in respiratory virus virology data for each sample. In practice, not all  
94 GPs take samples, and the proportion of patients for which samples are taken varied substantially, however  
95 the number of doctors participating, and the number of ILI patients observed and tested is known.

96 The hierarchical observation process is adapted from Cope *et al.* [21], with key details re-stated here for  
97 clarity.

98 We proceed by considering how an individual in the population who is infected may come to be observed  
99 in the dataset. Filtering occurs at three levels:

- 100 • Not all individuals infected with influenza will seek treatment, as cases may vary in severity, including  
101 potentially being mild or asymptomatic. We assume that each infectious individual has some (unknown,  
102 independent and identically distributed) probability of seeking treatment.
- 103 • Only a small proportion of GPs are part of the ASPREN network, and this proportion has varied  
104 over time. We assume that if an infectious patient consults a GP, then that GP has some fixed  
105 probability of being part of the ASPREN network (estimated annually based on the number of doctors  
106 that participate).
- 107 • The proportion of ILI cases that are sent for testing varies substantially (see Figures S1-3), both due  
108 to changes in ASPREN protocols, and variation in doctor behaviour. We assume that each infectious  
109 patient who attends an ASPREN GP has some probability (fixed, estimated from data, varying weekly)  
110 of being sent for testing.

111 To obtain population-level estimates from these data, we model this observation process: if  $Z_j$  is the number  
112 of individuals in the population seeking treatment for symptomatic influenza in week  $j$  ( $j \in \{1, 2, \dots, 52\}$ ),  
113 then we observe  $n_j \sim \text{Bin}(Z_j, p_j)$  confirmed cases, with  $p_j$  the normalization probability (i.e., the proportion  
114 of doctors in the state that are in the dataset, multiplied by the proportion of ILI cases those doctors sent for  
115 testing in that week). So, given  $n_j$  and  $p_j$ , the number of symptomatic individuals is  $Z_j \sim \text{NegBin}(n_j + 1, p_j)$ .  
116 Critically, this is a probabilistic estimate rather than a point estimate (e.g., Figure 2). Note that this is an  
117 estimate of the number of individuals who seek treatment with influenza; to obtain the total number of  
118 individuals with influenza we would also require an estimate of the probability of seeking treatment, which  
119 is not directly available from these data (though can be estimated using a model).

## 120 1.3 Influenza forecasting

121 In contrast to surveillance uncertainty, practitioners understand that forecast uncertainty is critical, and  
122 best practice includes reporting and assessing influenza forecast uncertainty ([12, 22]). A consequence of  
123 overlooking uncertainty in surveillance data is that, particularly when data are highly filtered or stratified  
124 (resulting in substantial uncertainty), the absence of uncertainty in estimates flows through to an absence of  
125 uncertainty in subsequent analyses. For example, assessing forecasts against point-estimate surveillance data  
126 could result in erroneous assessments; rather, forecasts should be assessed against probabilistic estimates of  
127 the true epidemic behaviour. Incorrect forecast assessment could lead to choosing inferior forecasting methods  
128 to inform management decisions, which could in the worst case have detrimental public health impacts, for  
129 example, planning hospital bed availability to peak at the wrong time.

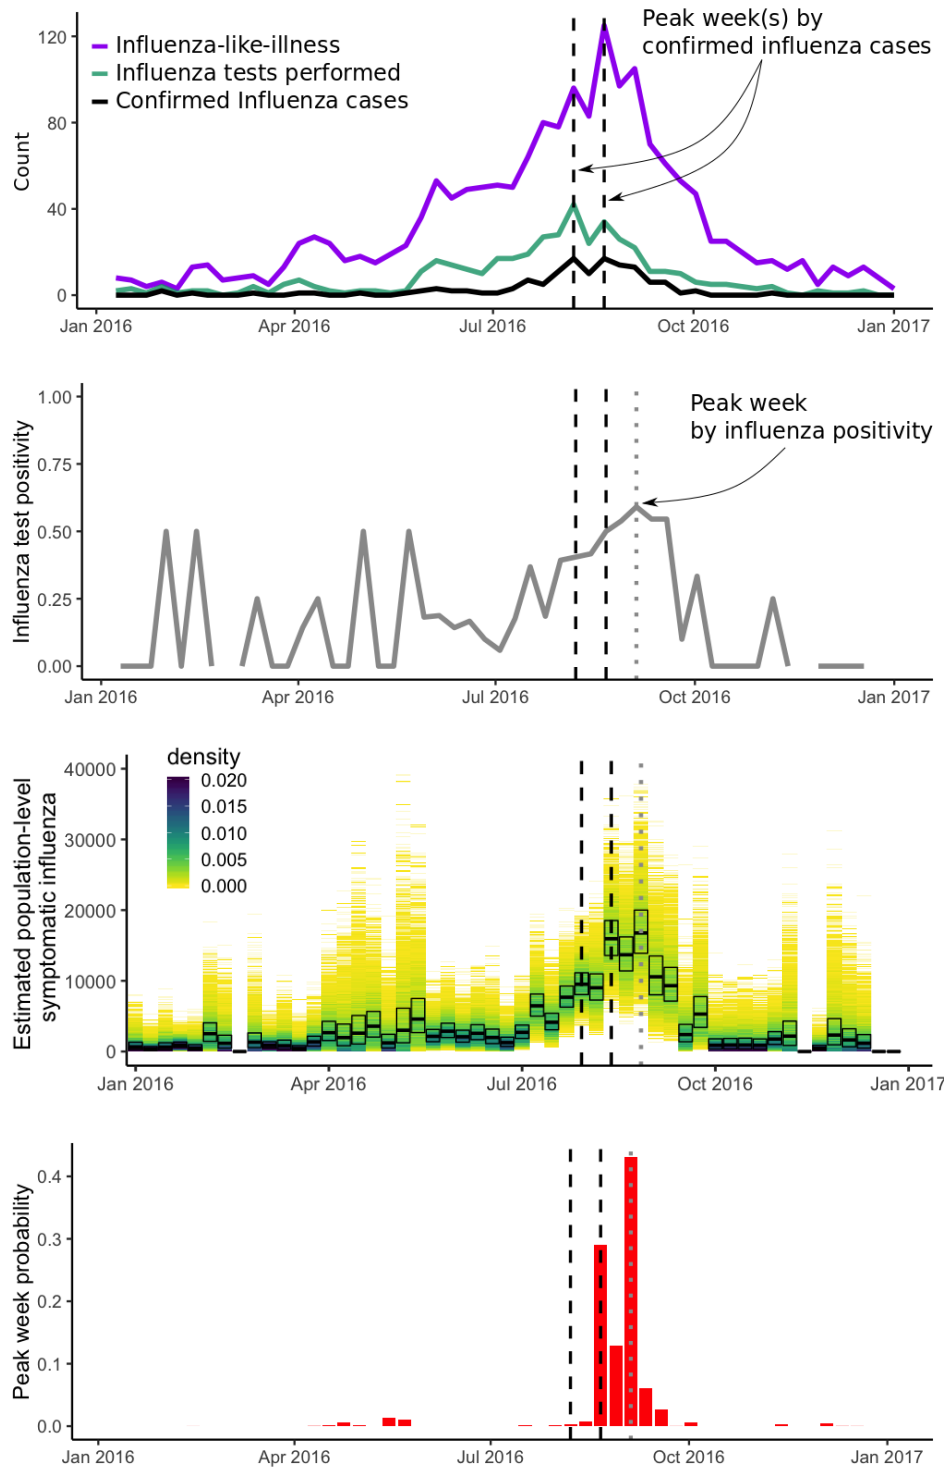

Figure 2: 2016 ASPREN Influenza surveillance data from New South Wales, demonstrating how observed data-level peaks can be misleading. The top figure shows confirmed influenza (black) and ILI (purple), along with the number of samples tested each week (green). These data would suggest peak-week point estimates in the weeks ending 6 August and 20 August (dashed black lines). The second figure (grey) shows influenza test positivity, which peaks during the week ending 4 September (dotted grey line), and is highly variable outside of the season when few tests were performed. The third panel (yellow – blue colour gradient) shows estimates of population-level symptomatic influenza incidence each week, with uncertainty: black boxes indicate the median and a 50% credible interval, with the shading showing the full density. The lowest panel (red) shows the distribution of population-level peak week calculated using all data. This demonstrates that the peak week inferred directly from the surveillance-level data can be misleading, and that test positivity is also a flawed metric.

130 A quantity of interest for surveillance and forecasting is the peak week, i.e., the week during the season that  
131 influenza incidence is highest. When the population-level influenza estimate for each week has a probability  
132 distribution, then the peak week must also have a distribution (i.e., the distribution of the maximum of the  
133  $Z_1, \dots, Z_{52}$ ). This can be evaluated through simulation. Figure 2 shows the relationship between surveillance  
134 data, test positivity, and population-level peak week distribution for data from New South Wales in 2016,  
135 demonstrating that considering the data directly or relying on positivity alone can be erroneous and at  
136 least fails to quantify the uncertainty inherent in estimates of peak week from surveillance data. Producing  
137 population-level estimates of symptomatic influenza incidence (Figure 2c) combines the ILI data, the number  
138 of tests performed, and the results of those tests to quantify incidence and uncertainty through the season;  
139 which is then used to produce a probabilistic estimate of the peak week (Figure 2d). After estimating this  
140 distribution for the true peak week, we can use it to assess forecasts, by generalizing metrics such as forecast  
141 skill, to average forecast skill over the distribution (see Section 4.6 for methods).

## 142 2 Results

143 To illustrate the link between influenza surveillance, forecasting, and forecast assessment, we apply this frame-  
144 work with ASPREN surveillance data in three Australian states (New South Wales, Queensland, and South  
145 Australia) for 2016 and 2017. We use surveillance data and the observation process to evaluate population-  
146 level symptomatic influenza incidence estimates, and use this to evaluate a distribution for the peak week  
147 (Figures 2, S1–S3). We used a two-stage approximate Bayesian computation based forecasting framework  
148 (see Section 4.3.3), with an underlying population-level stochastic epidemic model and an observation process  
149 explicitly linking surveillance data to population-level influenza (e.g. Figure 3). We extracted forecast distri-  
150 butions for peak week, which are assessed against probabilistic estimates of true peak week at the population  
151 level (Figure 4). We observed that forecasting was possible when data were sufficient, such as in New South  
152 Wales (both years), and in 2017 for Queensland and South Australia; but when data were very sparse it  
153 was not possible to effectively produce or assess forecasts (e.g. for South Australia in 2016). We evaluated  
154 average forecast skill (see Section 4.3.4) each week, and observed higher forecast skill in 2017, with the best  
155 performance in New South Wales (Figure 5). Due to the sparsity of data, the best achievable forecast skill  
156 was lower in 2016 than 2017, and particularly low in South Australia.

## 157 3 Discussion

158 Influenza surveillance and forecasting can provide important information for public health decision making.  
159 Of primary interest is the incidence of influenza, specifically, within populations. Unfortunately, current  
160 approaches to surveillance and forecasting do not evaluate this. Instead, they often work with influenza-  
161 like-illness (ILI), and operate at variable scales influenced by a myriad of other factors. In this study we  
162 demonstrate that analysis can be performed on influenza specifically, at the population level, by carefully  
163 considering the observation process and denominators that link population-level processes to observed data.  
164 Estimating influenza incidence at the population level allows comparison between historical seasons during  
165 which different numbers of tests were performed, and reduces the impact that incidences of other viruses have  
166 on influenza surveillance. As a specific example, Lambert *et al.* [5] describe how a hypothetical outbreak of  
167 respiratory syncytial virus could bias influenza estimates based on test positivity: under our framework, this  
168 potential bias would be eliminated. This shift in framework not only impacts surveillance and forecasting,  
169 but also allows for rigorous assessment of forecast accuracy that takes into account uncertainty in estimates  
170 of true data.

171 While we claim that, in most cases, the goal in influenza surveillance and forecasting should be to analyse  
172 population-level influenza incidence itself, it is possible that in some cases there may be other targets of  
173 interest. For example, in some applications one may be interested in influenza-like-illness presentations  
174 generally at particular points of care, such as at emergency departments. In this case, it would be reasonable  
175 to surveil, report, and forecast that quantity of interest, specifically. We advocate for careful consideration  
176 of the quantity of interest, how that links to the data available, and direct evaluation of that target quantity  
177 and its uncertainty.

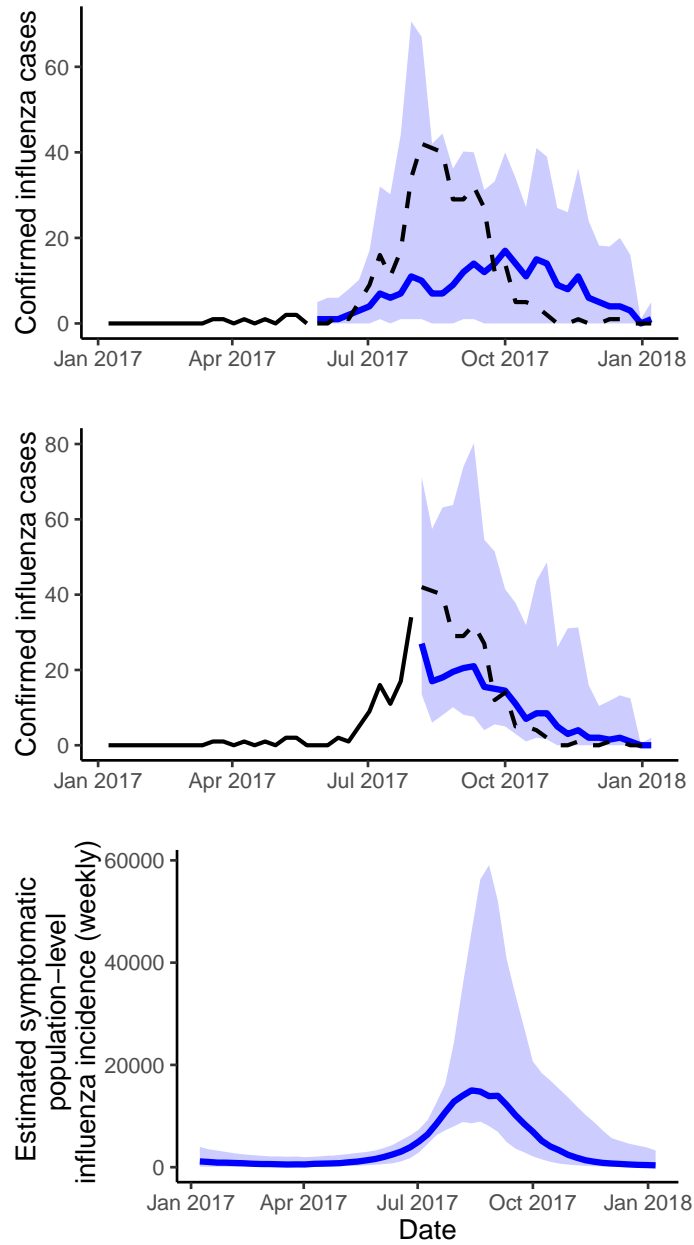

Figure 3: Forecasts for New South Wales in 2017: (top) before the start of the season, projected down to data-level, (middle) during the season, projected down to data-level, and (bottom) during the season, at population level. The black line is the observed data; the blue line the median forecast, and the shaded area the 90% prediction interval. Example forecasts projected down to data-level for all states and all years appear in the Supplemental Information (Figures S4–S5).

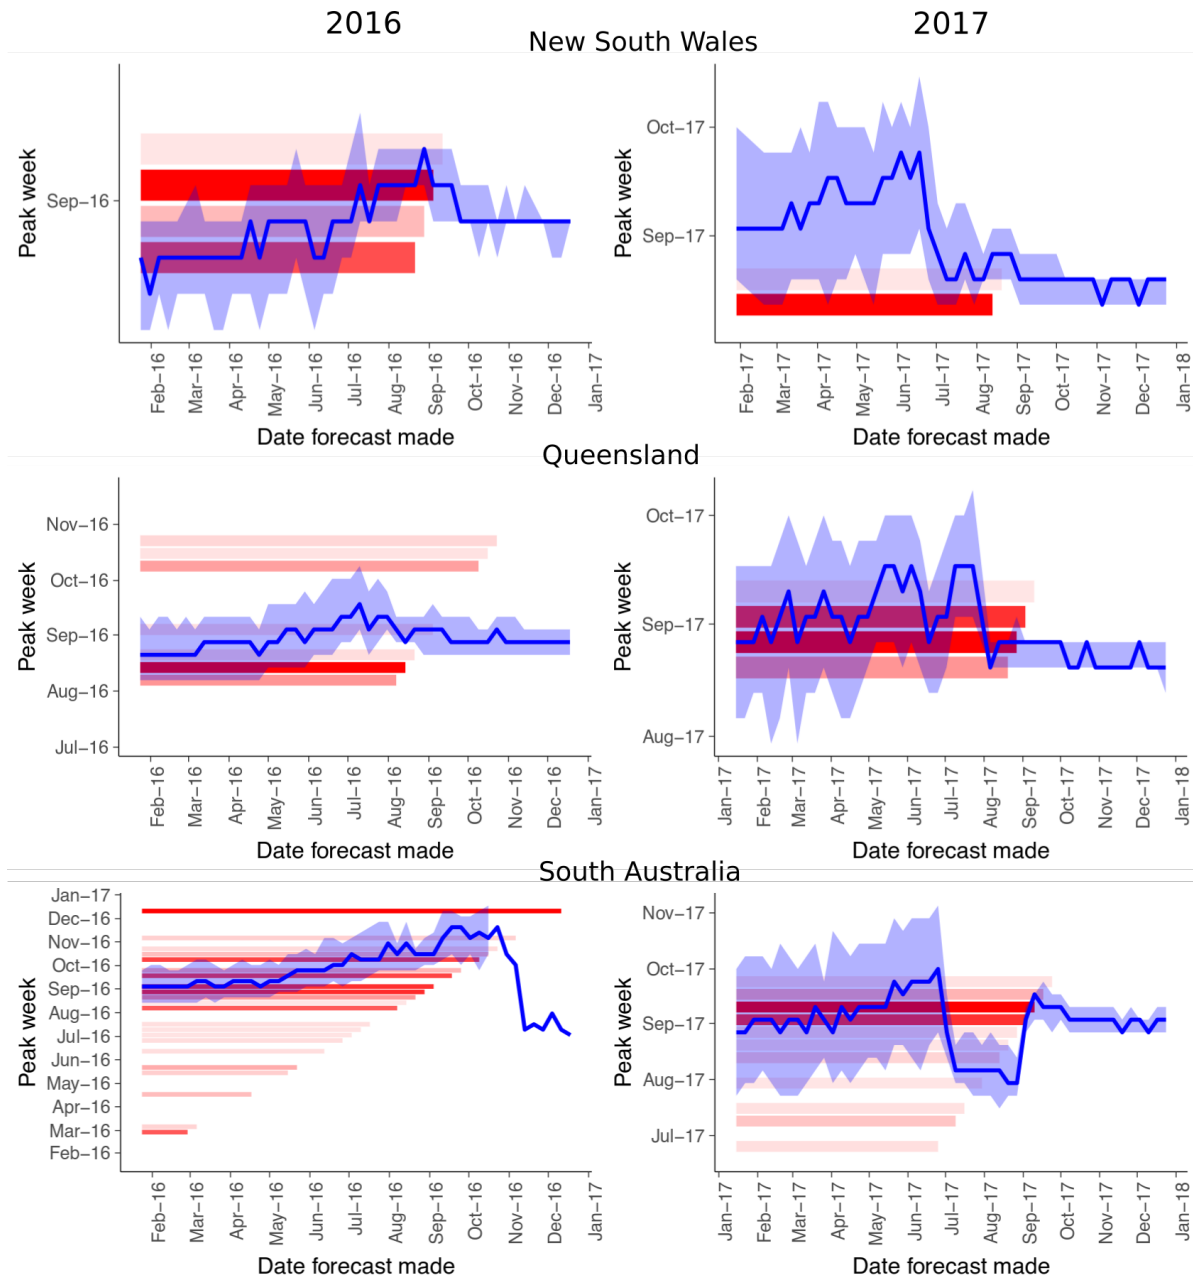

Figure 4: Progression of peak week forecasts each week during the season for New South Wales (top), Queensland (middle), and South Australia (bottom) during 2016 (left) and 2017 (right). The blue line indicates the median forecast, and the light blue area the 50% prediction interval. Red bars indicate the distribution of the population-level peak week, with the alpha proportional to the probability mass (i.e., darker bars correspond to higher probability); only those weeks with probability  $\geq 0.05$  are shown. The length of the red bars indicates where the axes are equal, i.e., the forecast is the current week. Therefore, predictive forecasts should converge to a given value before the end of the bar. See Appendix for influenza time series (Figures S1–S3) and example forecasts (Figures S4–S5).



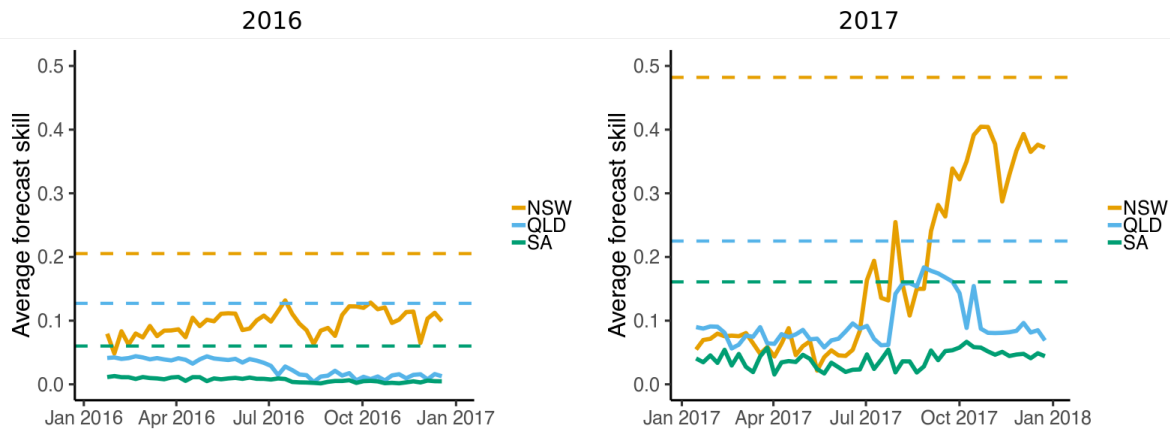

Figure 5: Progression of average forecast skill each week during 2016 and 2017. Note that while forecast skill can theoretically reach 1.0, this requires ideal conditions; in practice, the best achievable forecast skill would be that achieved by the observed distribution of peak week from the data shown here as a dotted line. See Appendix for influenza time series (Figures S1–S3).

178 A challenge posed by this shift in framework is communicating these ideas to the public health community.  
179 We claim that operating at the population level and with confirmed influenza specifically is an intuitive  
180 goal, but acknowledge that changes in approach, and in particular introducing uncertainty around perceived  
181 “truth” values such as the peak week, will require a concerted effort led by uptake by informed practitioners.  
182 But this shift in framework to surveilling and forecasting the quantities of interest will be of substantial  
183 benefit to the public health community.

### 184 3.1 Probabilistic forecast assessment

185 Recognizing that perceived “truth” values are themselves estimates with associated probability distributions,  
186 rather than point values, we require new, rigorous metrics for assessing forecast accuracy. There are a range  
187 of possible metrics; we chose examples that are natural generalisations of metrics currently used for assessing  
188 forecasts around point estimates [11, 12], by averaging over the distribution of the true peak week. However,  
189 two challenges remain: (i) since this approach to forecast assessment is new, there are no existing results to  
190 compare to, and (ii) metrics that assess forecasts against probability distributions depend on the probability  
191 distribution for the “truth”, such that no forecast can ever reach a “perfect” score (e.g., a forecast skill of 1,  
192 or average error of 0; except when the “truth” is a point estimate). There are substantial differences between  
193 the best possible scores in different states or years (Figure 5). For this reason, we suggest that metrics such  
194 as averaged forecast skill should be used as tools for comparison between methods (or over time), when  
195 comparing in the same location, against the same estimated truth distribution.

196 One tangential advantage of these metrics is that it allows one to retrospectively assess the value of the  
197 data being used for forecasting, by comparing the scores that would be achieved by the truth distribution  
198 itself. We observe this in the current study (Figure 5), whereby maximum possible forecast skill for peak  
199 week is substantially higher in 2017 than 2016 in all locations due to more data and clearer peaks. Maximum  
200 possible forecast skill for peak week was lowest in South Australia in 2016 where data was insufficient to  
201 perform effective forecasting, and there was no clear peak in the data.

202 We do not expect the distribution of a forecast ( $p_w$ , the forecast probability that the peak is week  $w$ ) to  
203 resemble the distribution of the truth ( $q_w$ , the probability that the peak is week  $w$  given the observed data),  
204 given that they are fundamentally different quantities. The distribution of the forecast takes into account all  
205 of the data from the season to produce a posterior forecast of epidemic trajectories (which becomes tighter

206 as more data becomes available). Whereas the distribution of the truth treats each week as an independent  
207 sample of the unobserved population-level quantity.

208 Note that point estimates of disease incidence can artificially inflate forecast accuracy score, because once,  
209 say, the peak week is observed, its value is known exactly. As such, if you are certain that you have observed  
210 the peak, your forecast can assign all probability to that week. This is why, for example, the forecasts assessed  
211 in Biggerstaff *et al.* [12] rapidly achieve skill scores of 1.0 after the peak has occurred.

## 212 **3.2 Assumptions, limitations, and future work**

213 One challenge of the forecasting we use is that to produce forecasts of influenza requires forecasts of tem-  
214 perature. In this study, we used a simple statistical time-series approach; it may be the case that improved  
215 forecasting of temperature could be obtained with more complex methods or by using externally-produced  
216 forecasts (i.e., from the Bureau of Meteorology; [www.bom.gov.au](http://www.bom.gov.au)). However, it is likely that stochasticity in  
217 both the disease and observation processes outweighs variation in temperature forecasts.

218 One limitation of this work is that it considers only a single influenza surveillance data stream. In prac-  
219 tice there are many complementary surveillance systems, and while none assess population-level influenza  
220 incidence directly, they each provide useful information. Future work will develop a rigorous framework to  
221 assimilate a full range of disease surveillance data streams to produce a combined estimate of population-level  
222 influenza incidence.

## 223 **3.3 Conclusion**

224 Disease surveillance, and subsequent analyses such as forecasting, should be focused on the quantity of inter-  
225 est, at the scale of interest; for influenza, this means evaluating influenza incidence itself, at the population  
226 level. We demonstrate a framework in which this is possible, and show that this impacts not just forecasting,  
227 but also for the assessment of forecasts. This framework should be applied broadly by researchers and public  
228 health professionals, both for influenza and more generally across communicable diseases.

# 229 **4 Methods**

## 230 **4.1 Data**

231 Influenza data were obtained as part of the ASPREN project (13; [https://aspren.dmac.adelaide.edu.](https://aspren.dmac.adelaide.edu.au/)  
232 [au/](https://aspren.dmac.adelaide.edu.au/)). In this study, we used those data from three states: New South Wales, Queensland, and South Australia.  
233 We produced forecasts for the 2016 and 2017 seasons, using the two preceding years of data to inform prior  
234 distributions in each case. For this to be possible, we required sufficient levels of epidemic data from the  
235 two preceding years, as sparse historical data could produce poor estimates. Forecasts were based on weekly  
236 aggregate counts of influenza, tests, ILI, and the number of doctors contributing to the database.

237 Historical climate data were obtained from the Australian Government Bureau of Meteorology ([www.bom.](http://www.bom.gov.au/climate/data)  
238 [gov.au/climate/data](http://www.bom.gov.au/climate/data)), at stations 066062 (Sydney - Observatory Hill), 040913 (Brisbane), and 023090  
239 (Adelaide - Kent Town). We used climate data from state capital cities in each case, as both the majority  
240 of the state population and the majority of doctors in the study were located in these cities. Temperature  
241 observations were taken every three hours (i.e., 8 times per day). Note that three-hourly observations creates  
242 a cyclic temperature pattern with both daily and annual periods. So as to avoid having unrealistic diurnal  
243 dynamics, we used the average daily temperature rather than the three-hourly observations themselves.

244 We used fixed, total population sizes of 6.9 million, 4.3 million, and 1.6 million, in each state respectively,  
245 based on 2011 Australian Bureau of Statistics estimates. While in practice these populations are increasing  
246 over time, including demography would add considerable complexity, which we wished to avoid.

## 247 4.2 Estimating population-level peak week from surveillance data

248 Using surveillance data and the observation process, we can evaluate the distribution of population-level  
249 influenza incidence, each week. We can compare these distributions across a year to produce a distributional  
250 estimate of the peak week. This proceeds as follows:

- 251 • For each week, given  $n_j$  observed influenza cases with  $p_j$  the normalization probability (i.e., the pro-  
252 portion of doctors in the state that are in the dataset, multiplied by the proportion of ILI cases those  
253 doctors sent for testing in that week), generate  $Z_j \sim \text{NegBin}(n_j + 1, p_j)$ .
- 254 • Compare the generated  $Z_j$  to determine the peak week.
- 255 • Repeat this process many (e.g., 10,000) times and collate the results to evaluate the distribution for  
256 the population-level peak week.

## 257 4.3 Influenza forecasting

### 258 4.3.1 Epidemic model

259 We constructed a stochastic epidemic model for the spread of seasonal influenza within a population (Figure  
260 S6; following [21]). This model featured temperature-driven transmission, with  $R_0 = \bar{R}_0 + a(T - \bar{T})$ , where  
261  $T$  is the mean daily temperature,  $\bar{T}$  is the mean over the full temperature dataset, and  $\bar{R}_0$  and  $a$  are fitted  
262 parameters (using approximate Bayesian computation; see Section 4.3.3, and Supplementary Materials). The  
263 model operated continuously through time, across years with waning immunity, rather than modelling each  
264 season separately, and treating influenza as a single disease (rather than separating strains). This means  
265 that consecutive seasons are related, and that at the beginning of a season there remains immunity in the  
266 population due to transmission in previous years. Rather than evaluate exact simulations of a full continuous-  
267 time model, a binomial approximation was used with 8 timesteps per day (i.e., corresponding to the climate  
268 observations).

### 269 4.3.2 Temperature forecasting

270 To forecast influenza using a model that is driven by temperature, we were first required to forecast tem-  
271 perature dynamics, at a three-hourly resolution (i.e., 8 observations per day). Our approach was to use  
272 statistical time-series methods, in particular an autoregressive integrated moving average (ARIMA) model  
273 with seasonal forcing at both annual and daily timescales. We used the ‘forecast’ package in R [25, 26] to  
274 fit Fourier  $x$ -regularisation terms to capture seasonality, and to fit an ARIMA(1,0,1) model to temperature,  
275 from which we could then simulate. This produced a seasonal pattern that appeared similar to historical tem-  
276 perature data, although had fewer extremely hot or cold days. While this model is not perfect, it appeared  
277 to sufficiently capture the seasonality in temperature which would then drive the seasonality in influenza  
278 dynamics.

### 279 4.3.3 Forecasting algorithm

280 Assume that we wish to produce a forecast from data up until week  $w$  of year  $Y$  (Figure 6). For all preceding  
281 weeks, assume we have full climate information, weekly influenza data, and denominators (i.e., the number  
282 of doctors participating, and the proportion of ILI cases sent for testing). Influenza forecasting proceeds as  
283 such:

- 284 1. Fit the model to all of the observed data from years  $Y - 2$  and  $Y - 1$ , using approximate Bayesian  
285 computation and an uninformative prior (ABC; see Supplementary Materials for details). The result  
286 of this process is a posterior distribution, in the form of a collection of particles, which includes both  
287 the model parameters, and the (unobserved) model states. This posterior distribution is retained as a  
288 collection of particles.
- 289 2. Consider the data from the current year, for weeks  $1, \dots, w$ . Use ABC to fit the model to these data.  
290 The prior distribution for this process is a modified version of the final posterior distribution from Step

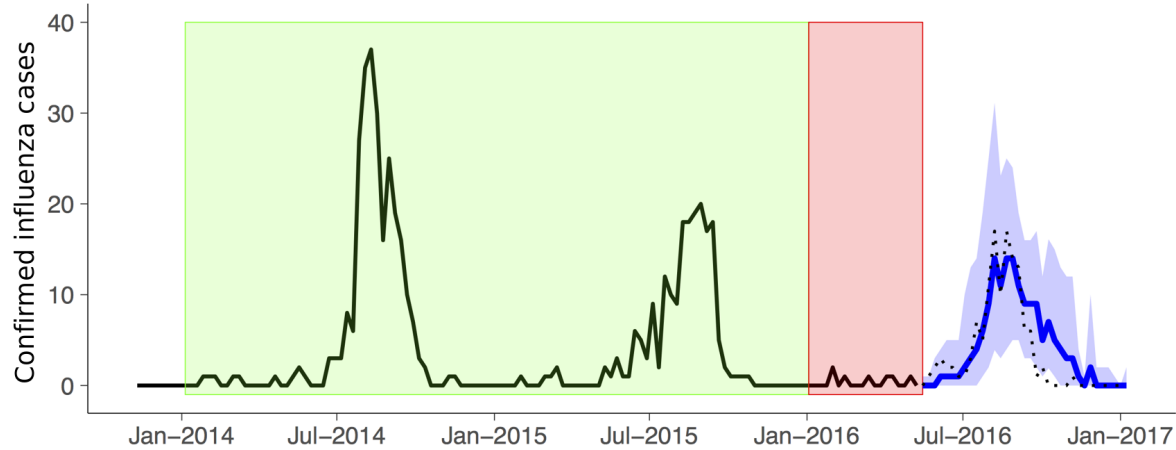

Figure 6: Schematic describing forecasting process for an example week in 2016. The black line is the observed data (dotted over the forecast period). ABC is performed on two preceding years of data (green region), and the posterior used as a prior for the current season. ABC is then performed again within the current season, based on data observed to date (red), and a forecast is produced for the remainder of the season by progressing accepted particles forward through the rest of the season (blue solid line is the median forecast; shaded region is the 50% prediction interval). The population-level forecast is projected down to the data-level using the true normalization data observed in that week.

291 (1), including initialising the unobserved model states at the beginning of this year as those from the  
 292 posterior distribution at the end of the previous year.

- 293 • To modify the prior so as to allow for between-season variation due to, e.g., differences in strains:  
 294 (i) select a random time point, uniformly, from week 20 to week 27; (ii) at that time point,  
 295 reallocate individuals between the (hidden) susceptible and recovered classes, by way of a mixture  
 296 distribution, i.e., generate  $u \sim U[0, 1]$ . Then the updated  $S$  and  $R$  values (denoted  $S^*$  and  $R^*$ )  
 297 are:

$$(S^*, R^*) = \begin{cases} (S', S + R - S') | S' \sim \text{Binomial}(S + R, S/(S + R)) & u < 0.6 \\ (S', S + R - S') | S' \sim \text{floor}(U[0, 1] * (S + R + 1)) & u > 0.6. \end{cases}$$

298 The mixture proportion (0.6) was chosen to balance the potential for both similar strains and  
 299 shifts to substantially different strains.

- 300 3. Produce temperature forecasts for the remainder of the current season using an ARIMA model as  
 301 described above.
- 302 4. Sample from the accepted particles and project forward from their state at the end of the ABC period.  
 303 Retain the sample paths.

#### 304 4.4 Forecast assessment

305 Advances in epidemiological forecasting have been concomitant with advances in the reporting and assessment  
 306 of forecasts. Historical forecast assessment most commonly assessed point forecasts directly, by asking if the  
 307 point forecast was within some interval (e.g.,  $\pm 1$  week) of the observation (e.g. [11]). As emphasis has moved  
 308 to probabilistic forecasting, forecast assessment has moved towards logarithmic scoring rules (e.g., [12]). Held  
 309 and Meyer [22] provide a comprehensive summary of the state of the art in forecast assessment.

310 Let  $p_w$  be the forecast probability that the peak week is week  $w$ , and  $q_w$  be the probability that  $w$  is the  
311 true population-level peak week. We report two accuracy metrics:

- 312 • Forecast skill score, i.e., the exponential of log score average over the true week distribution:  $\exp(\sum_w q_w \ln(p_w))$ .  
313 This is equivalent to the forecast skill score used elsewhere [12] when the truth is a point estimate (i.e.,  
314 only has density in a single week).
- 315 • Average error in peak week predictions:  $\sum_{w_1} q_{w_1} \sum_{w_2} p_{w_2} |w_2 - w_1|$ . This is equivalent to average  
316 (absolute) error if the truth is a point estimate. This is reported in the Supplemental Information  
317 (Figure S7).

318 There are other metrics that could reasonably be used (e.g., mean squared error, or Kullback-Leibler di-  
319 vergence), however we chose to focus on these two as they are most analogous to those used in existing  
320 forecasting analyses.

321

## 322 References

- 323 [1] J.S. Casalegno, D. Eibach, M. Valette, V. Enouf, I. Daviaud, S. Behillil, A. Vabret, J.C. Soulayr, M. Ben-  
324 chaib, J.M. Cohen, S. Van Der Werf. Performance of influenza case definitions for influenza community  
325 surveillance: based on the French influenza surveillance network GROG, 2009–2014. *Eurosurveillance*,  
326 22 (2017).
- 327 [2] S.G. Sullivan, J. Raupach, L.J. Franklin, K. Pennington, C. Bareja, R. de Kluiver, National Influenza  
328 Surveillance Committee, Communicable Diseases Network Australia. A brief overview of influenza  
329 surveillance systems in Australia, 2015. *Communicable Diseases Intelligence quarterly report*. 40, E351  
330 (2016).
- 331 [3] A. Camacho, B. Cazelles. Does homologous reinfection drive multiple-wave influenza outbreaks? Ac-  
332 counting for immunodynamics in epidemiological models. *Epidemics*. 5, 187–196 (2013).
- 333 [4] A.J. Kucharski, J. Lessler, J.M. Read, H. Zhu, C.Q. Jiang, Y. Guan, et al. Estimating the life course of  
334 influenza A (H3N2) antibody responses from cross-sectional data. *PLoS Biology*. 13, e1002082 (2015).
- 335 [5] S.B. Lambert, C.E. Faux, K.A. Grant, S.H. Williams, C. Bletchly, M.G. Catton, D.W. Smith, H.A.  
336 Kelly. Influenza surveillance in Australia: we need to do more than count. *Med J Aust*. 193, 43-5 (2010).
- 337 [6] C. Viboud, P.Y. Bolle, F. Carrat, A.J. Valleron, A. Flahault. Prediction of the spread of influenza  
338 epidemics by the method of analogues. *American Journal of Epidemiology*. 158, 996-1006 (2003).
- 339 [7] L. Hufnagel, D. Brockmann, T. Geisel. Forecast and control of epidemics in a globalized world. *Pro-  
340 ceedings of the National Academy of Sciences*. 101, 15124-9 (2004).
- 341 [8] J. Shaman, A. Karspeck. Forecasting seasonal outbreaks of influenza. *Proceedings of the National  
342 Academy of Sciences*. 109, 20425-30 (2012).
- 343 [9] J.S. Brownstein, S. Chu, A. Marathe, M.V. Marathe, A.T. Nguyen, D. Paolotti, N. Perra, D. Perrotta,  
344 M. Santillana, S. Swarup, M. Tizzoni. Combining participatory influenza surveillance with modeling  
345 and forecasting: three alternative approaches. *JMIR Public Health and Surveillance*. 3 (2017).
- 346 [10] E.L. Ray, N.G. Reich. Prediction of infectious disease epidemics via weighted density ensembles. *PLoS  
347 Computational Biology*. 14, e1005910 (2018).
- 348 [11] M. Biggerstaff, D. Alper, M. Dredze, S. Fox, I.C. Fung, K.S. Hickmann, B. Lewis, R. Rosenfeld, J.  
349 Shaman, M.H. Tsou, P. Velardi. Results from the centers for disease control and prevention’s predict  
350 the 2013–2014 Influenza Season Challenge. *BMC Infectious Diseases*. 16 (2016).

- 351 [12] M. Biggerstaff, M. Johansson, D. Alper, L.C. Brooks, P. Chakraborty, D.C. Farrow, S. Hyun, S. Kandula,  
352 C. McGowan, N. Ramakrishnan, R. Rosenfeld. Results from the second year of a collaborative effort to  
353 forecast influenza seasons in the United States. *Epidemics*. (2018).
- 354 [13] S.G. Sullivan, M. Chilver, G. Higgins, A.C. Cheng, N.P. Stocks. Influenza vaccine effectiveness in  
355 Australia: results from the Australian Sentinel Practices Research Network. *Med J Aust*. 201, 109–11  
356 (2014).
- 357 [14] E.O. Nsoesie, J.S. Brownstein. Computational approaches to influenza surveillance: beyond timeliness.  
358 *Cell Host & Microbe*. 17, 275-8 (2015).
- 359 [15] X. Yang, D. Liu, K. Wei, X. Liu, L. Meng, D. Yu, H. Li, B. Li, J. He, W. Hu. Comparing the similarity  
360 and difference of three influenza surveillance systems in China. *Scientific Reports*. 8, 2840 (2018).
- 361 [16] C.E. Koppeschaar, V. Colizza, C. Guerrisi, C. Turbelin, J. Duggan, W.J. Edmunds, C. Kjels, R. Mexia,  
362 Y. Moreno, S. Meloni, D. Paolotti. Influenzanet: Citizens Among 10 Countries Collaborating to Monitor  
363 Influenza in Europe. *JMIR Public Health and Surveillance*. 3 (2017).
- 364 [17] S.J. Carlson, C.B. Dalton, D.N. Durrheim, J. Fejsa. Online Flutracking survey of influenza-like illness  
365 during pandemic (H1N1) 2009, Australia. *Emerging Infectious Diseases*. 16,1960 (2010).
- 366 [18] C.B. Dalton, S.J. Carlson, M.T. Butler, E. Elvidge, D.N. Durrheim. Building influenza surveillance  
367 pyramids in near real time, Australia. *Emerging Infectious Diseases*. 19, 1863 (2013).
- 368 [19] H.A. Kelly, K.A. Grant, E.L. Tay, L. Franklin, A.C. Hurt. The significance of increased influenza  
369 notifications during spring and summer of 2010?11 in Australia. *Influenza and Other Respiratory Viruses*.  
370 7,1136-41 (2013).
- 371 [20] S.G. Sullivan, K.S. Carville, M. Chilver, J.E. Fielding, K.A. Grant, H. Kelly, A. Levy, N.P. Stocks,  
372 S.S. Tempone, A.K. Regan. Pooled influenza vaccine effectiveness estimates for Australia, 2012–2014.  
373 *Epidemiology & Infection*. 144, 2317–28 (2016).
- 374 [21] R.C. Cope, J.V. Ross, M. Chilver, N.P. Stocks, L. Mitchell. Characterising seasonal influenza epidemi-  
375 ology using primary care surveillance data. *PLoS Computational Biology*. (2018).
- 376 [22] Held L, and Meyer S. Forecasting based on Surveillance Data in *Handbook of Infectious Disease Data*  
377 *Analysis*, Held L, Hens N, O’Neill PD, & Wallinga J, editors. (Chapman & Hall; London, United  
378 Kingdom; 2019).
- 379 [23] J.K. Pritchard, M.T. Seielstad, A. Perez-Lezaun, M.W. Feldman. Population growth of human Y chro-  
380 mosomes: a study of Y chromosome microsatellites. *Molecular Biology and Evolution*. 16, 1791–1798  
381 (1999).
- 382 [24] M.A. Beaumont, W. Zhang, D.J. Balding. Approximate Bayesian computation in population genetics.  
383 *Genetics*. 162, 2025–2035 (2002).
- 384 [25] R. Hyndman, G. Athanasopoulos, C. Bergmeir, G. Caceres, L. Chhay, M. O’Hara-Wild, F. Petropoulos,  
385 S. Razbash, E. Wang, F. Yasmeeen. forecast: Forecasting functions for time series and linear models. R  
386 package version 8.4, <http://pkg.robjhyndman.com/forecast> (2018).
- 387 [26] R.J. Hyndman, Y. Khandakar. Automatic time series forecasting: the forecast package for R. *Journal*  
388 *of Statistical Software*. 26 1–22 (2008).

## 389 Acknowledgements

390 **General:** We thank the general practitioners and nurse practitioners whom report data to ASPREN, SA  
391 Pathology for laboratory testing, Adelaide Health Technology Assessment for database management and  
392 Datavation for FluSync tool development.

393 **Funding:** R.C.C., L.M., and J.V.R. received funding from the Data To Decisions Cooperative Research  
394 Centre (D2D CRC). J.V.R. received funding from the Australian Research Council through the Future  
395 Fellowship scheme (FT130100254). J.V.R. and L.M. received funding through the Centre of Excellence  
396 for Mathematical and Statistical Frontiers (ACEMS). J.V.R., L.M., and R.C.C. received funding through  
397 the National Health and Medical Research Council (NHMRC) Centre of Research Excellence for Policy  
398 Relevant Infectious Disease Simulation and Mathematical Modelling (PRISM2). This work was supported  
399 with supercomputing resources provided by the Phoenix HPC service at the University of Adelaide. The  
400 Australian Sentinel Practices Research Network is supported by the Australian Government Department of  
401 Health (the Department); the opinions expressed in this paper are those of the authors, and do not necessarily  
402 represent the views of the Department.

403 **Author contributions:** R.C.C., J.V.R. and L.M. designed the project. M.C. and N.P.S. collected and  
404 curated the influenza surveillance data. R.C.C. performed the analysis and drafted the manuscript. All  
405 authors edited the manuscript.

406 **Competing interests:** The authors declare that no competing interests exist.

407 **Data availability:** Upon publication, data will be made available at a public repository.

## 408 Supplementary Materials

### 409 Example data streams

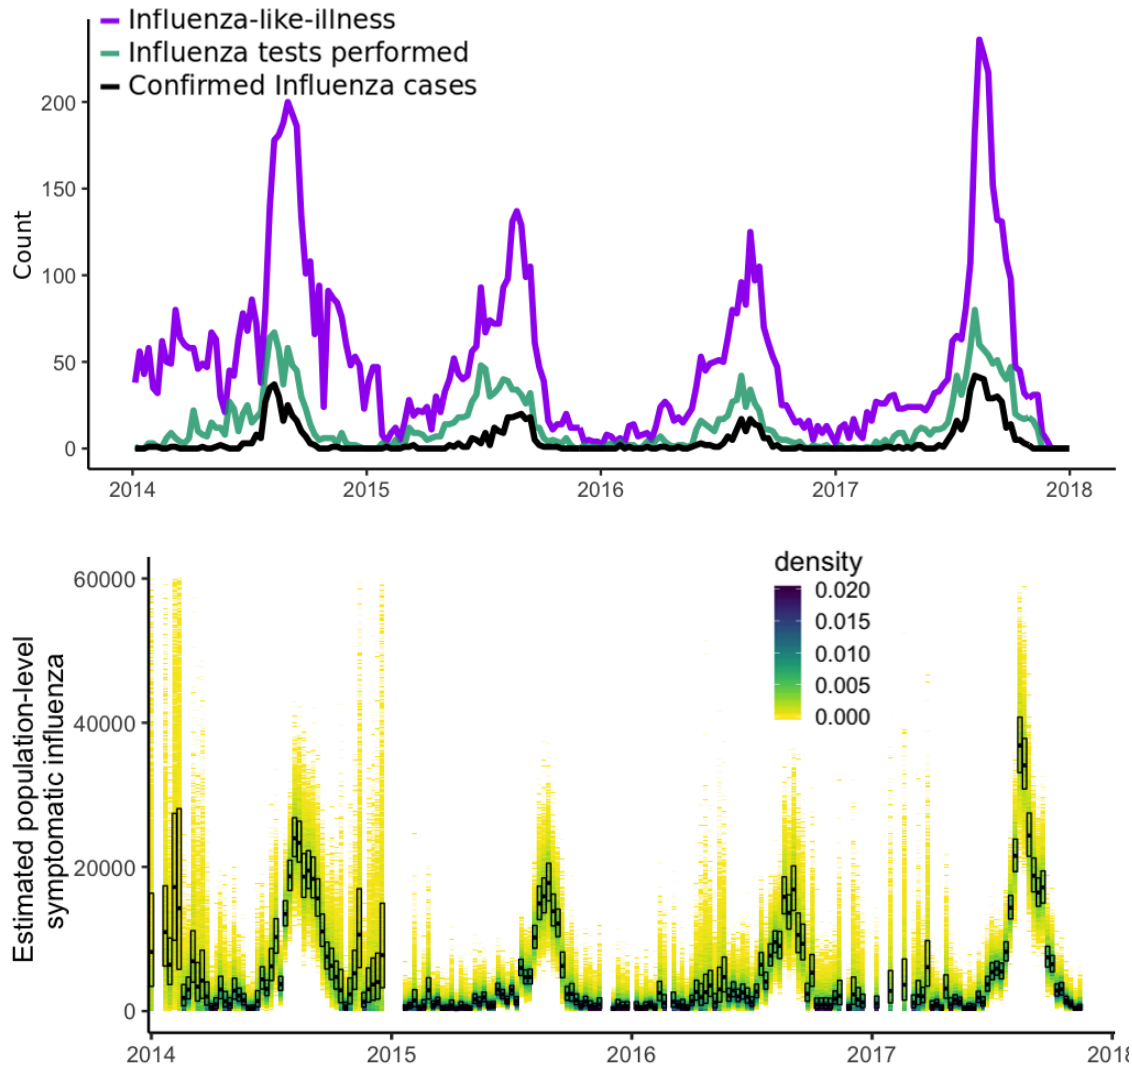

410

Figure S1: (above) Confirmed influenza (black), testing (green) and influenza-like-illness (purple) in New South Wales across 2014–2017, in the ASPREN database. Data from 2014–2015 were used to construct priors that informed forecasting in 2016; similarly, data from 2015–2016 were used to construct priors that informed forecasting in 2017. (below) Estimated population-level symptomatic influenza incidence in New South Wales across 2014–2017, based on the ASPREN data. Weeks in which no influenza tests were performed are omitted. Shading (orange) indicates probability density, boxes (black) indicate median and 25-75% quantiles.



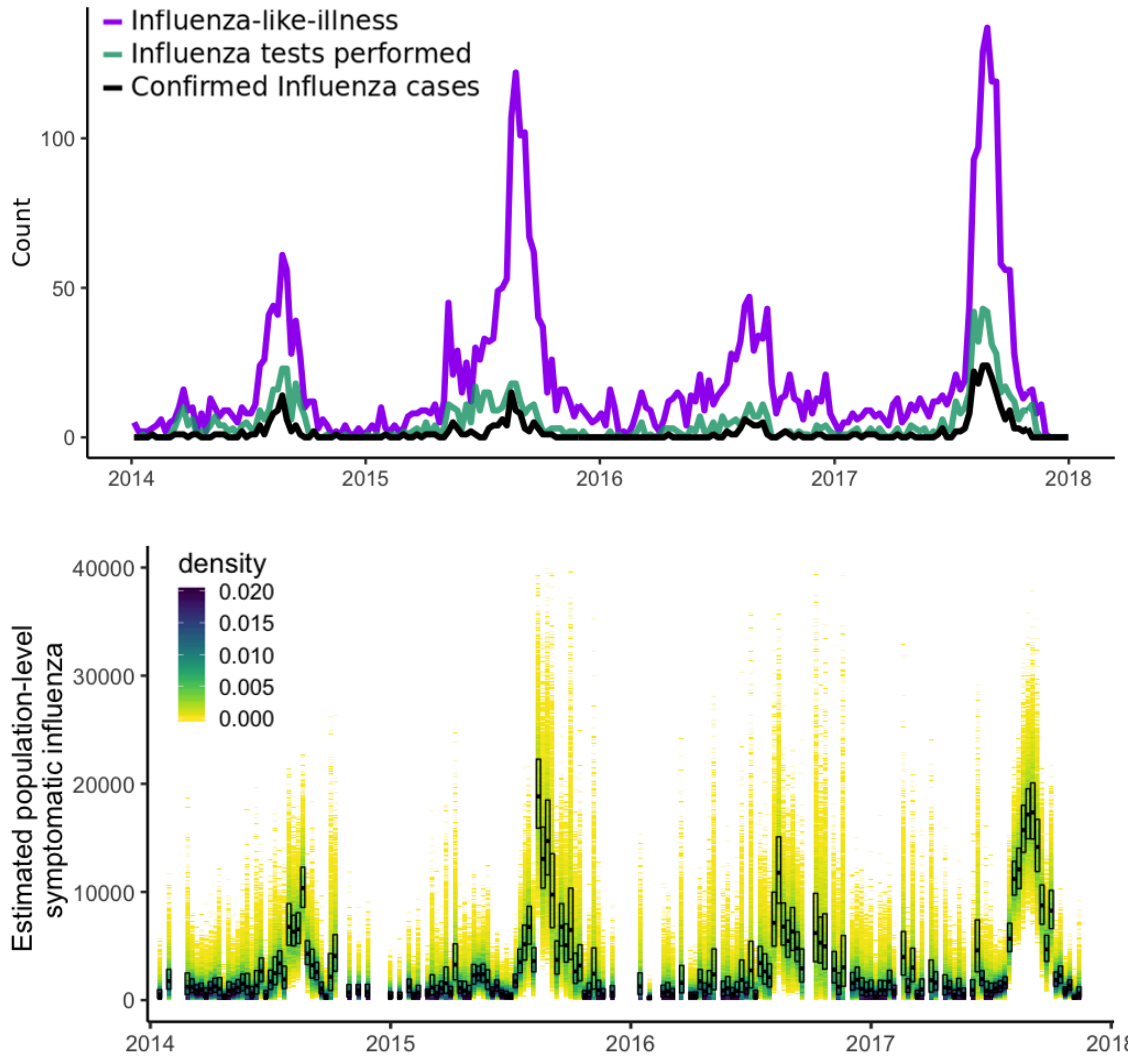

411

Figure S2: (above) Confirmed influenza (black), testing (green) and influenza-like-illness (purple) in Queensland across 2014–2017, in the ASPREN database. Data from 2014–2015 were used to construct priors that informed forecasting in 2016; similarly, data from 2015–2016 were used to construct priors that informed forecasting in 2017. (below) Estimated population-level symptomatic influenza incidence in Queensland across 2014–2017, based on the ASPREN data. Weeks in which no influenza tests were performed are omitted. Shading (orange) indicates probability density, boxes (black) indicate median and 25–75% quantiles.

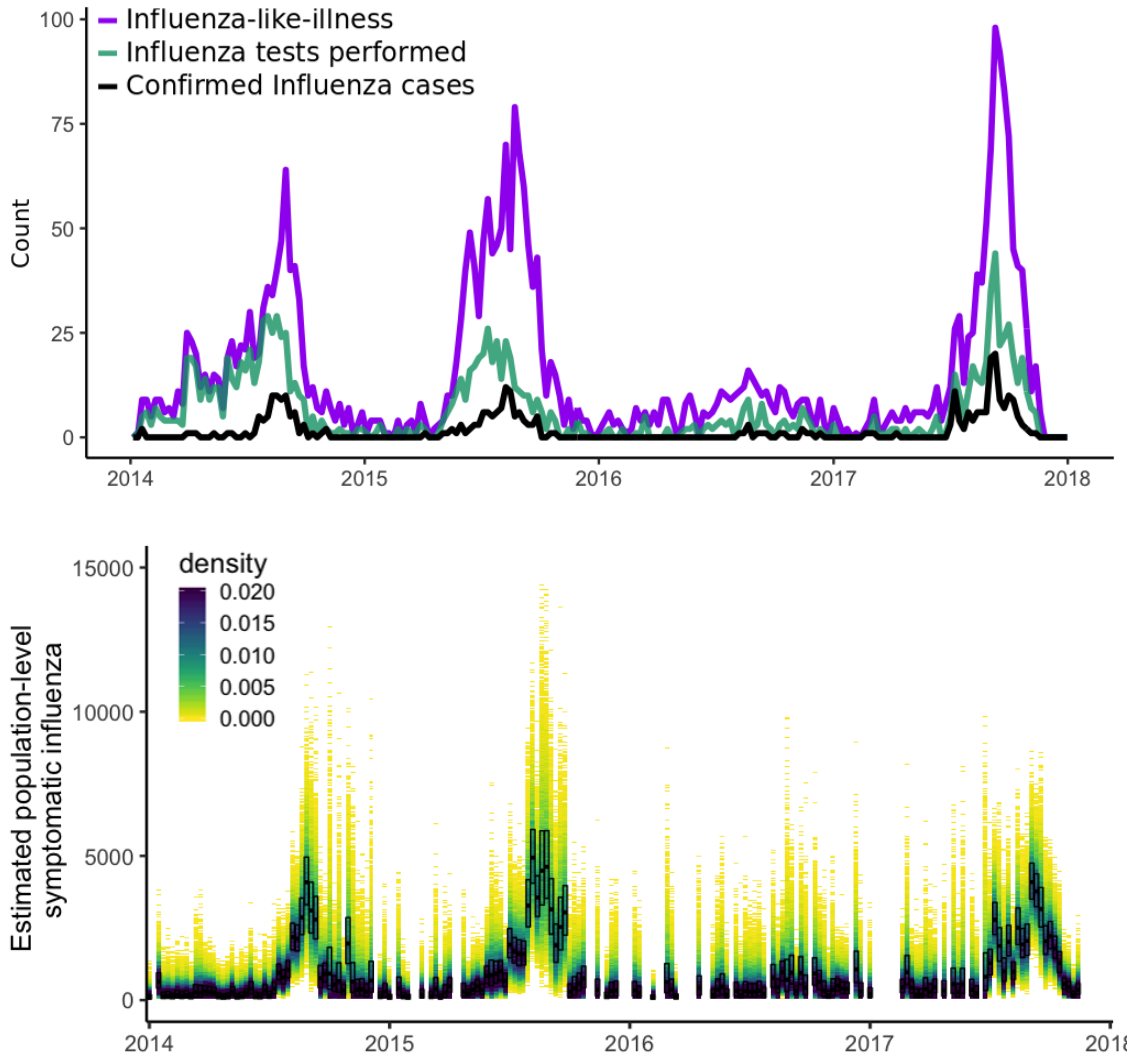

412

Figure S3: (above) Confirmed influenza (black), testing (green) and influenza-like-illness (purple) in South Australia across 2014–2017, in the ASPREN database. Data from 2014–2015 were used to construct priors that informed forecasting in 2016; similarly, data from 2015–2016 were used to construct priors that informed forecasting in 2017. (below) Estimated population-level symptomatic influenza incidence in South Australia across 2014–2017, based on the ASPREN data. Weeks in which no influenza tests were performed are omitted. Shading (orange) indicates probability density, boxes (black) indicate median and 25–75% quantiles.

413 **Forecast examples**

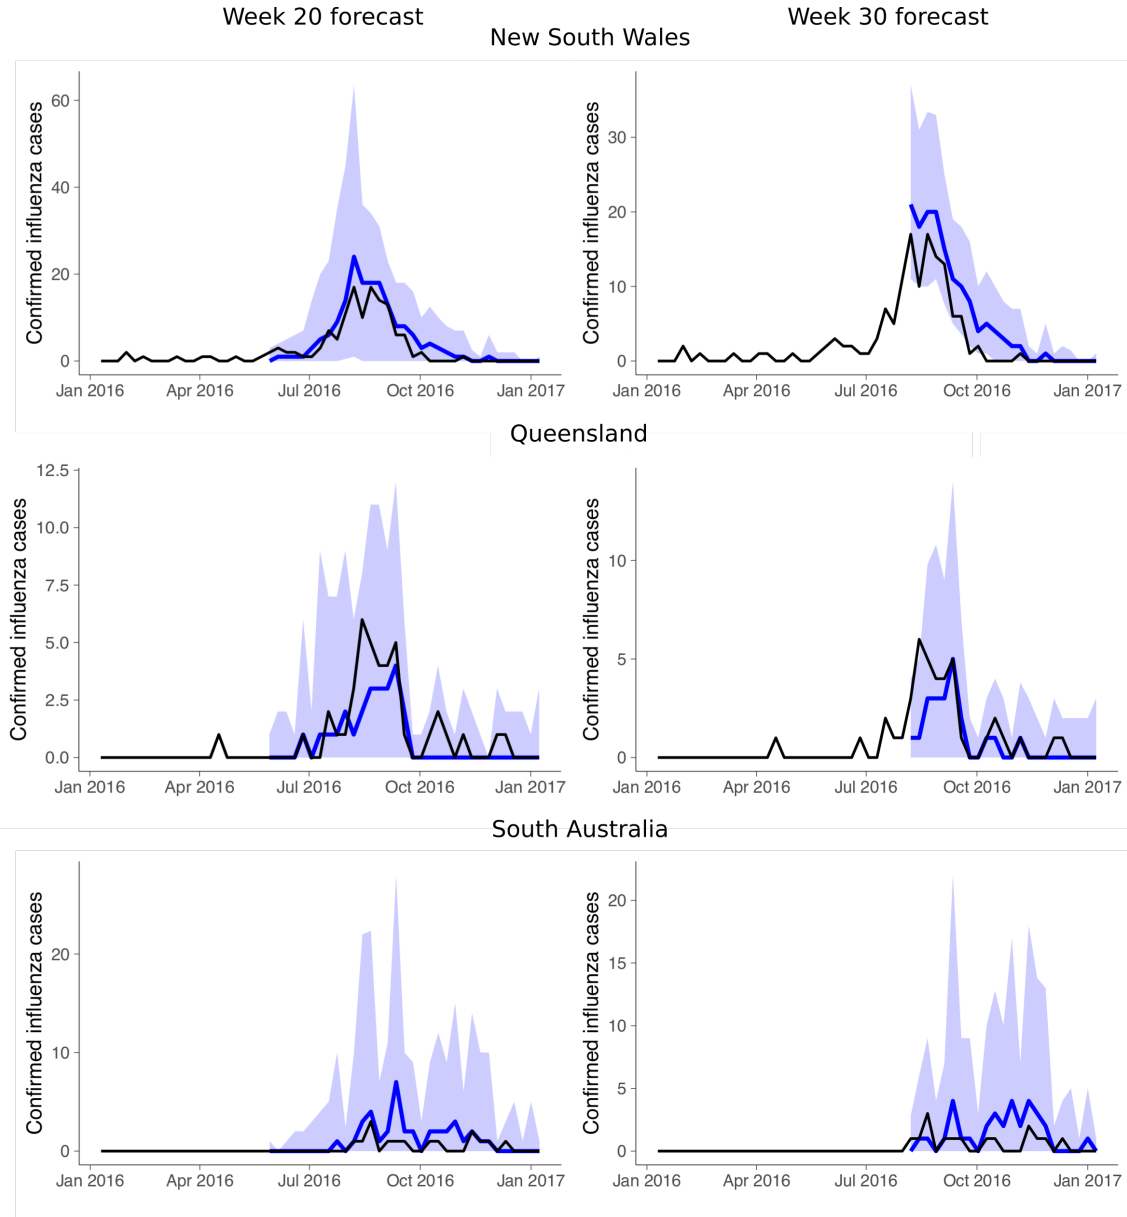

414

Figure S4: Illustrative forecasts from New South Wales (top), Queensland (middle), and South Australia (bottom) for 2016, projected down to the level of the data. The left panel shows forecasts made before the start of the season (week 20); the right panel forecasts made during the season (week 30). The red line shows the observed influenza data, the blue line the median forecast and the light blue area the 50% prediction interval.

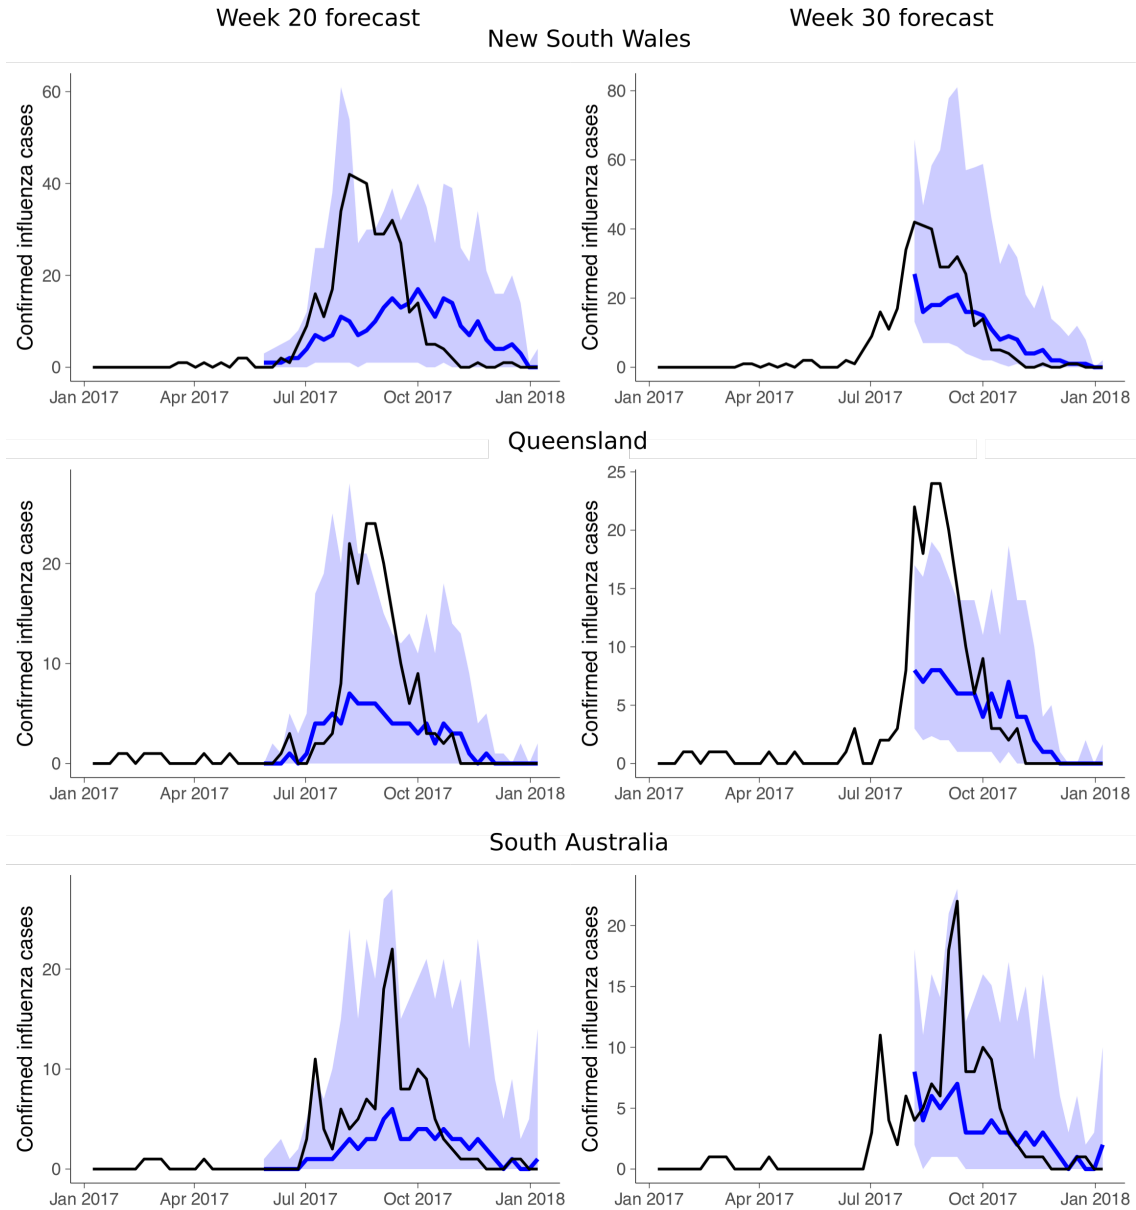

415

Figure S5: Illustrative forecasts from New South Wales (top), Queensland (middle), and South Australia (bottom) for 2017, projected down to the level of the data. The left panel shows forecasts made before the start of the season (week 20); the right panel forecasts made during the season (week 30). The red line shows the observed influenza data, the blue line the median forecast and the light blue area the 50% prediction interval.

## 416 Approximate Bayesian computation (ABC)

Approximate Bayesian computation (ABC) [23, 24] is a likelihood-free Bayesian statistical method, which we use for parameter estimation as part of forecasting. We aim to estimate the (joint) posterior distribution for model parameters (e.g., rates of infection, recovery, waning immunity, treatment seeking) in the stochastic epidemic model (Figure S6; following Cope *et al.* [21]); to do this we select parameters sets (particles) from the prior, simulate from the model using the particle, and accept the particle as part of the posterior if the resulting simulated realisation (i.e., a time-series of weekly confirmed influenza counts at ASPREN doctors) is close to the observed data under a chosen metric. In this study, we chose a weighted squared error metric:

$$\mathcal{D} := \sqrt{\frac{1}{\# \text{ of weeks}} \sum_{i=1}^{\# \text{ weeks}} \sqrt{\text{true}_i + 1} (\text{true}_i - \text{candidate}_i)^2},$$

417 with  $\text{true}_i$  the observed number of cases in the  $i^{\text{th}}$  week from the ASPREN dataset and  $\text{candidate}_i$  the number  
 418 in the simulated realisation from the candidate particle. The weighting was chosen so as to value weeks with  
 419 higher influenza activity (within the season) higher than those with little activity. When fitting the two  
 420 preceding seasons to the season of interest, the threshold was set to  $0.8 \times \mathcal{D}(0)$ , where  $\mathcal{D}(0)$  is the score that  
 421 would be achieved by a season with no influenza activity. This was to ensure that the accepted realisations  
 422 did actually resemble the data, while allowing for variation in activity between seasons. When fitting during  
 423 the season, the threshold was chosen adaptively to ensure an acceptance proportion of 1%.

424 Prior distributions for the initial, two-year fitting period were chosen to be uninformative. Exponentially-  
 425 distributed priors were used for latent, infectious, and immune periods, so as to have unbounded positive  
 426 support (with means of 1 day, 2 days, and 10,000 days, respectively). Transmission was temperature dependant,  
 427 with  $R_0 = \bar{R}_0 + a(T - \bar{T})$ ; so  $\bar{R}_0$  had a Gamma(2,2.5) distributed prior, and the seasonality parameter  
 428  $a$  was -Exp(0.2). The probability an infected individual would seek treatment had a Uniform(0.1,1.0) prior.  
 429 In the second ABC phase, fitting to the season of interest, the prior distribution was taken to be the posterior  
 430 sample from the initial two-year fitting.

431 Given that the model treats influenza as a single disease rather than fitting strains separately, prior and  
 432 posterior distributions should not be treated as biologically informative, rather the goal of this analysis was  
 433 solely to obtain forecasts. An epidemiologically-motivated analysis of influenza based on ASPREN data  
 434 appears in Cope *et al.* [21].

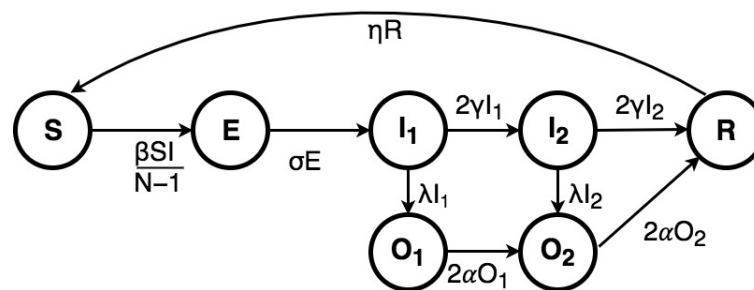

Figure S6: Stochastic epidemic model schematic.

436 Average Forecast Error

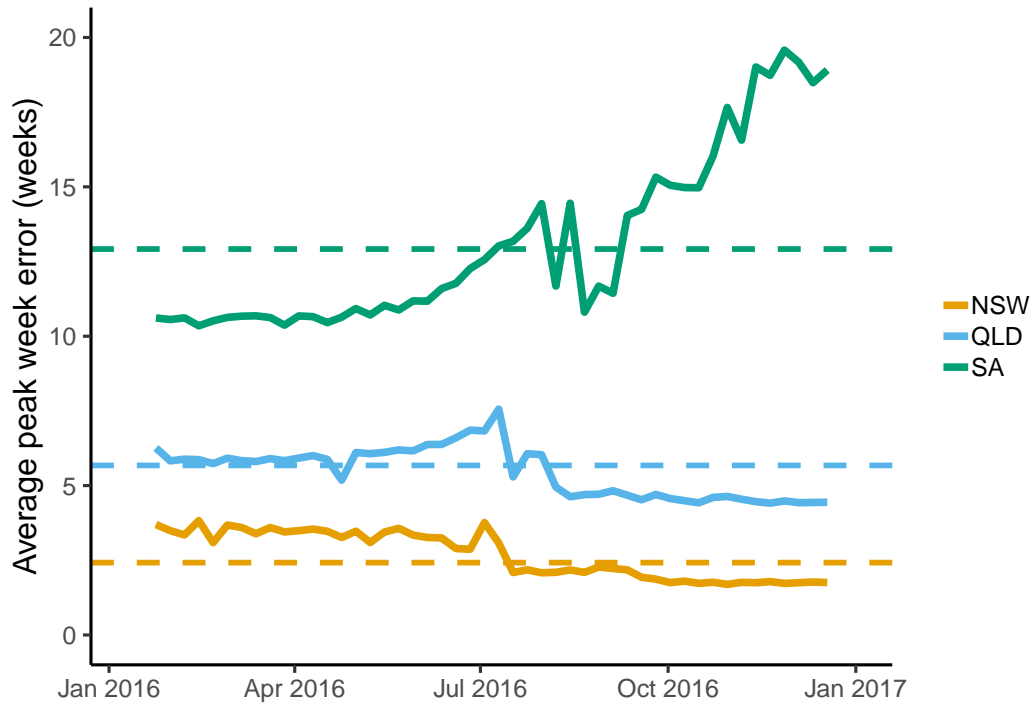

437

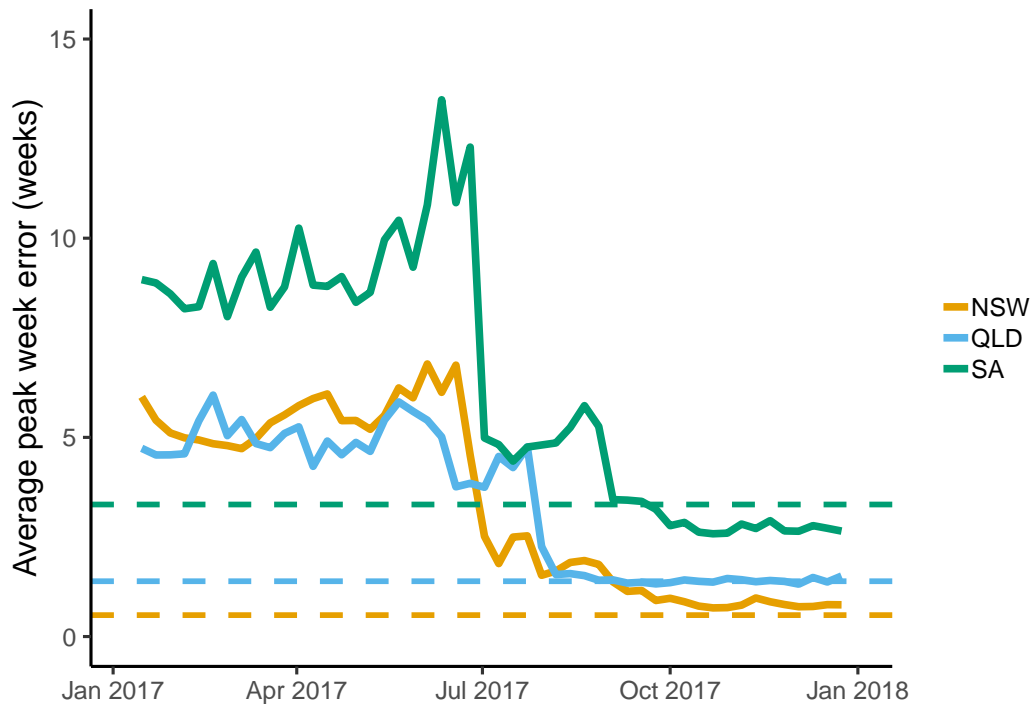

Figure S7: Progression of average forecast error each week during 2016 and 2017. Note that while forecast error can theoretically reach 0, this requires ideal conditions; in practice. An illustrative baseline of achievable forecast error is that achieved by the observed distribution of peak week from the data, shown here as a dashed line.
